# Supplementary material for: Expression of Concern: Tumor Suppressor MicroRNA-27a in Colorectal Carcinogenesis and Progression by Targeting SGPP1 and Smad2
Source: PubMed Central journal article supplement (PMC9879486; doi:10.1371/journal.pone.0280980), 2023-01-26
Supplement: pone.0280980.s004.pdf [file pone.0280980.s004.pdf]

HCT116, SW480 and Caca0 cells were originally transfected with miR-146a and miR-27a, and the quantifications of transfection with miR-27a in the 3 cell lines were used for the generation of Fig.4A.

Fig.4B

**HCT116细胞**

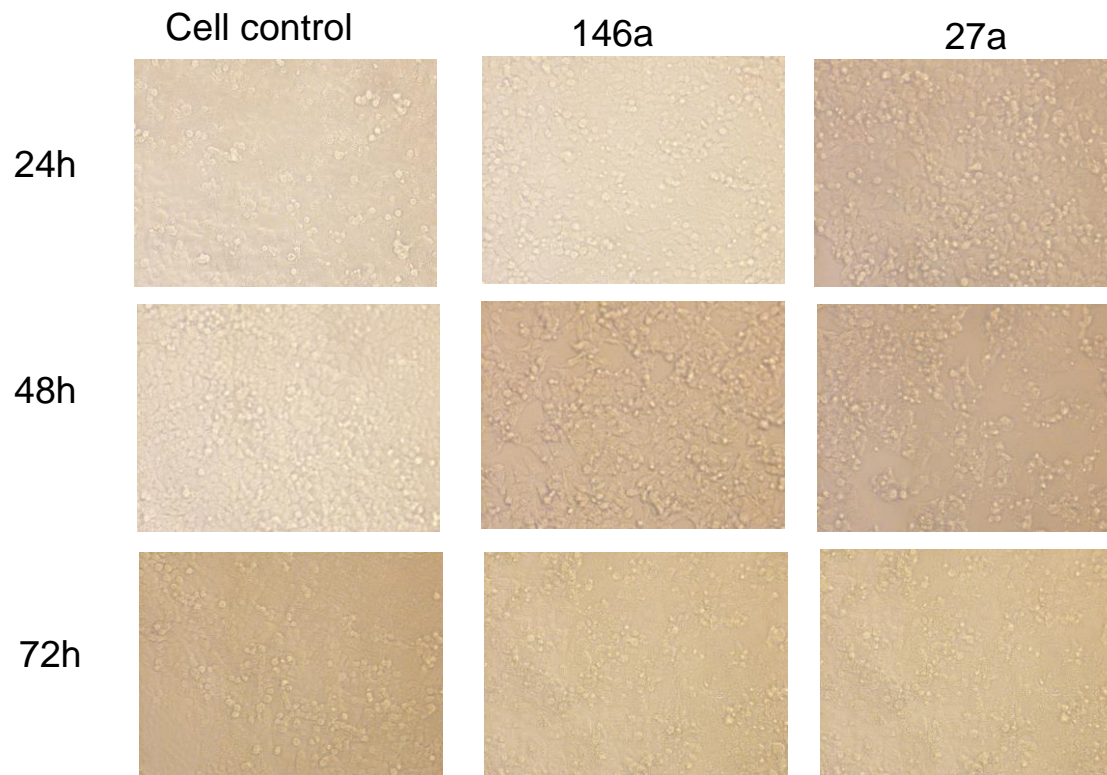

# SW480细胞

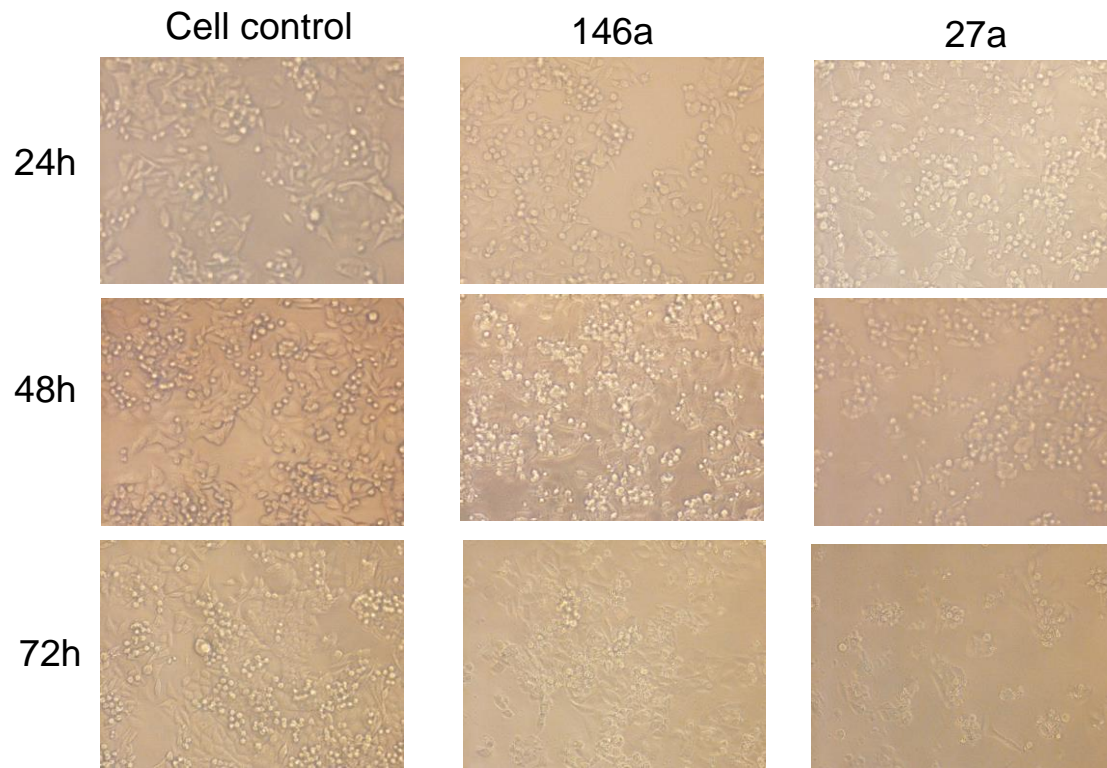

# CACO2细胞

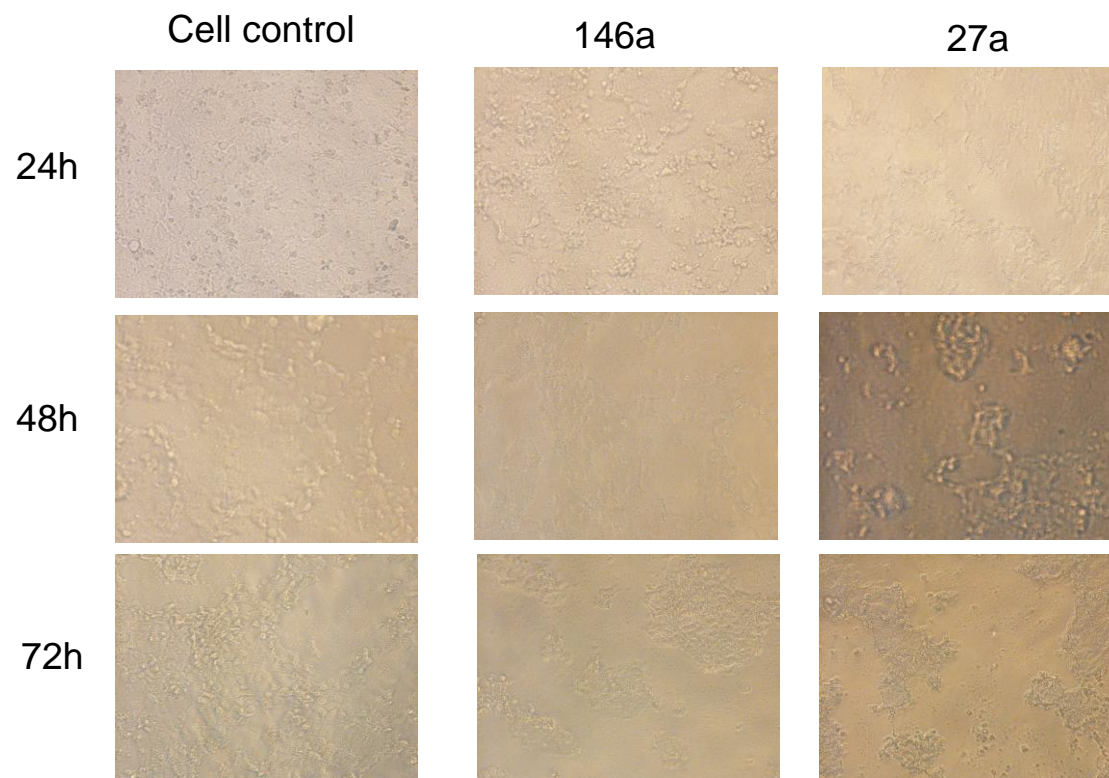

Fig.4C

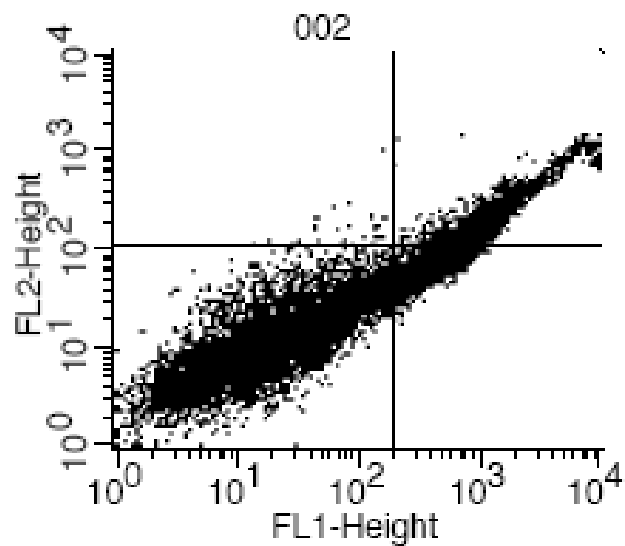

File: 002

| Quad | % Gated | % Total |
|------|---------|---------|
| UL   | 0.35    | 0.35    |
| UR   | 22.20   | 22.20   |
| LL   | 61.25   | 61.25   |
| LR   | 16.20   | 16.20   |

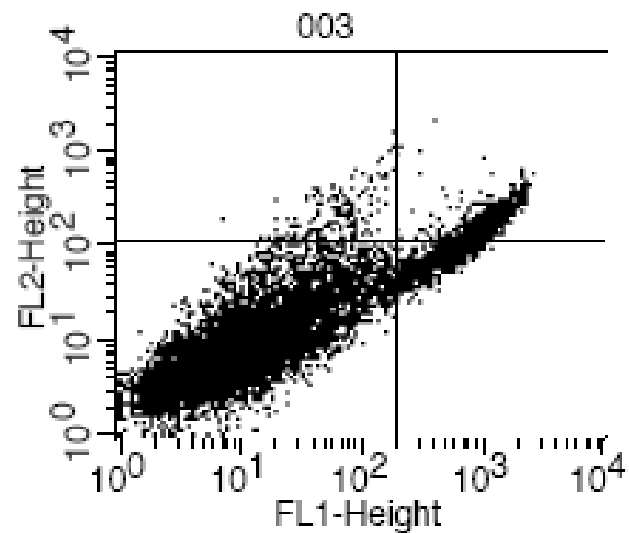

File: 003

| Quad | % Gated | % Total |
|------|---------|---------|
| UL   | 1.50    | 1.50    |
| UR   | 8.55    | 8.55    |
| LL   | 82.38   | 82.38   |
| LR   | 7.57    | 7.57    |

HCT116 cells transfection with 27a -24h
